# Supplementary material
Source: publisher site journal article supplement (https://www.dovepress.com/get_supplementary_file.php?f=411043.docx)
Supplement: Supplementary file 1 [file get_supplementary_file.php]

**Table S1 Demographic characteristics of the included and excluded samples**

| Variables | Included samples(n=210) | Excluded samples (n=925) | *p-*value |
| --- | --- | --- | --- |
| Age(years, M±SD) | 18.66±1.00 | 18.82±1.18 | 0.07 |
| Males (n, %) | 829(39.00) | 350(37.80) | 0.74 |
| Residence |  |  | 0.46 |
| Rural (n,%) | 182(86.70) | 783(84.60) |  |
| Urban (n,%) | 28(13.30) | 142(15.40) |  |
| Health status |  |  | 0.08 |
| Good (n,%) | 118(52.6) | 554(59.9) |  |
| Medium (n,%) | 88 (41.9) | 330(35.7) |  |
| Poor (n,%) | 4 (1.9) | 41(4.4) |  |
| SES (M±SD) | 8.27±2.14 | 8.49±2.24 | 0.18 |
| BMI (M±SD) | 21.00±2.51 | 20.64±2.60 | 0.07 |
| Duration of smartphone use (hours, M±SD) | 3.07±0.80 | 2.81±0.92 | <0.001 |
| Total scores of smartphone dependence (M±SD) | 23.91±8.30 | 23.28±9.17 | 0.36 |
| Smartphone dependence (n,%) | 64 (30.5) | 215(23.2) | 0.03 |
| Total PA levels (MET-min/w, M±SD) | 3.34±0.37 | 3.27±0.42 | 0.01 |
| Physical activity level |  |  | 0.001 |
| High group（n,%） | 79 (37.6) | 355(38.4) |  |
| Medium group（n,%） | 116 (55.2) | 419(45.3) |  |
| Low group（n,%） | 15 (7.1) | 151(16.3) |  |

Notes: Total PA levels were log-transformed.

Abbreviations: M=mean; SD=standard deviation; SES=socioeconomic status; BMI=body mass index; PA=physical activity.

T**able S2 Bivariate correlations between smartphone use**

| Variables | 1 | 2 | 3 |
| --- | --- | --- | --- |
| 1. Duration of smartphone usea |  |  |  |
| 2. Total scores of smartphone dependencea | 0.02 |  |  |
| 3. Duration of smartphone useb | 0.08 | 0.07 |  |
| 4. Total scores of smartphone dependenceb | 0.04 | 0.46** | 0.33** |

Notes: ***P*<0.01; a =baseline; b =follow-up

**Table S3 Bivariate associations between inflammatory markers**

| Variables | 1 | 2 | 3 | 4 | 5 | 6 | 7 |
| --- | --- | --- | --- | --- | --- | --- | --- |
| 1. TNF-αa |  |  |  |  |  |  |  |
| 2. IL-6a | 0.75** |  |  |  |  |  |  |
| 3. IL-1βa | 0.90** | 0.73** |  |  |  |  |  |
| 4. CRPa | -0.03 | -0.04 | -0.03 |  |  |  |  |
| 5. TNF-αb | -0.14* | -0.06 | -0.19** | 0.08 |  |  |  |
| 6. IL-6b | 0.27** | 0.35** | 0.32** | -0.01 | 0.04 |  |  |
| 7. IL-1βb | -0.05 | 0.05 | -0.01 | -0.02 | 0.47** | 0.36** |  |
| 8. CRPb | -0.12 | -0.08 | -0.18** | 0.43** | 0.13 | -0.16* | -0.01 |

Notes: **P*<0.05; ***P*<0.01; a =baseline; b =follow-up

Abbreviations: TNF-α=tumor necrosis factor-α; IL-6=interleukin-6; IL-1β=interleukin-1β; CRP=C-reactive protein.

**Figure S1 The physical activity levels in different groups of smartphone dependence.**

Notes: * *P*<0.05;

Abbreviations: SD=smartphone dependence; Non-SD=non-smartphone dependence; PA= physical activity
